# Supplementary material for: Remarkable enhancement of catalytic activity of a 2 : 1 complex between a non-planar Mo(v)–porphyrin and a ruthenium-substituted Keggin-type heteropolyoxometalate in catalytic oxidation of benzyl alcohols
Source: Royal Society of Chemistry journal article supplement (doi:10.1039/c2dt30424d), 2012-01-01
Supplement: c2dt30424d.pdf [file c2dt30424d.pdf]

Supplementary Information for

## **Remarkable enhancement of catalytic activity of a 2:1 complex between a non-planar Mo(V)-porphyrin and a ruthenium-substituted Keggin-type heteropolyoxometalate in catalytic oxidation of benzyl alcohols**

**Atsutoshi Yokoyama,<sup>a,b</sup> Kei Ohkubo,<sup>a</sup> Tomoya Ishizuka,<sup>c</sup> Takahiko Kojima,<sup>\*c</sup> and Shunichi Fukuzumi<sup>\*a,b</sup>**

<sup>a</sup> *Department of Material and Life Science, Graduate School of Engineering, Osaka University, ALCA, Japan Science and Technology Agency (JST), 2-1 Yamada-oka, Suita, Osaka 565-0871, Japan. E-mail: [fukuzumi@chem.eng.osaka-u.ac.jp](mailto:fukuzumi@chem.eng.osaka-u.ac.jp)*

<sup>b</sup> *Department of Bioinspired Chemistry (WCU), Ewha Womans University, Seoul 120-750, Korea*

<sup>c</sup> *Department of Chemistry, Graduate School of Pure and Applied Science, University of Tsukuba, 1-1-1 Tennoudai, Tsukuba, Ibaraki 305-8571, Japan. E-mail: [kojima@chem.tsukuba.ac.jp](mailto:kojima@chem.tsukuba.ac.jp)*

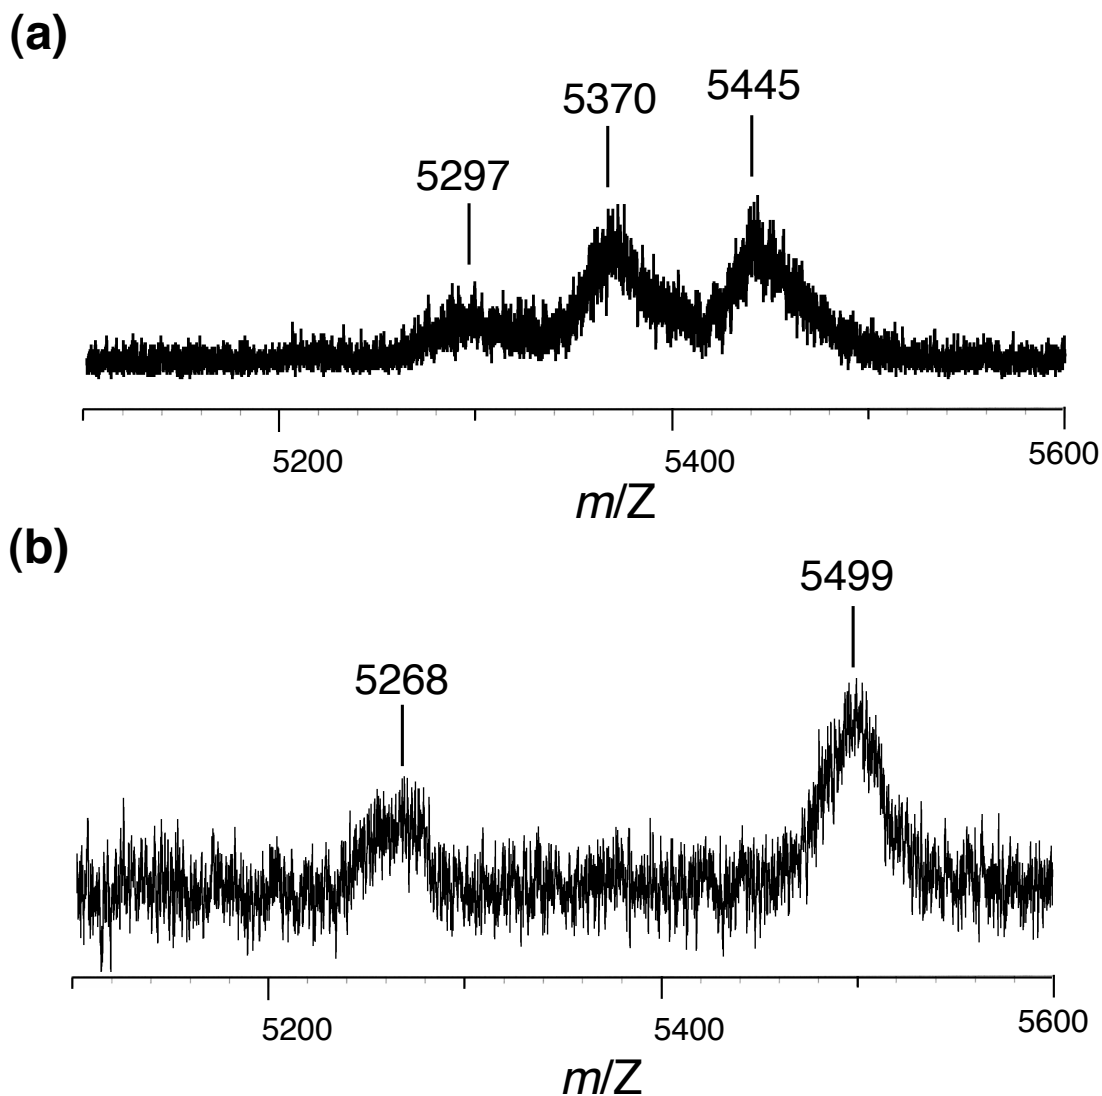

**Fig. S1.** MALDI-TOF-MS spectra in the negative mode: (a) **3** before the oxidation reaction; (b) after the oxidation reaction of benzylalcohol by **3** and PhIO in  $\text{CDCl}_3$ . The peaks at  $m/z = 5499$  and  $m/z = 5268$  were assigned to that of  $\{\mathbf{3} + \text{ClO}\}^-$  (calcd. 5497) and that of  $\{\mathbf{3} - 2\text{Ph} - \text{O}\}^-$  (calcd. 5275), respectively.

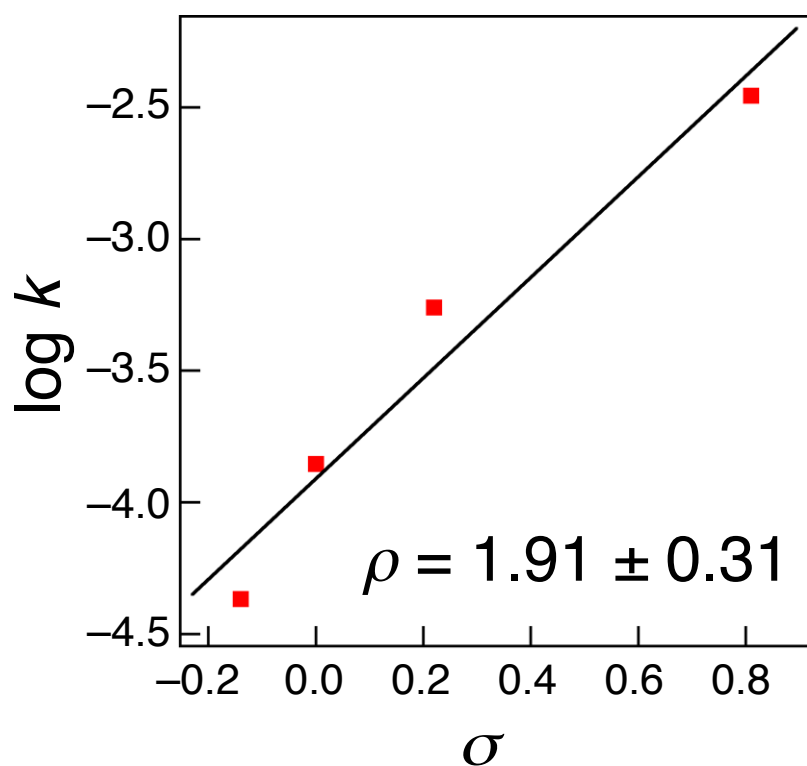

**Fig. S2** A Hammett plot for the pseudo-first-order rate constants of oxidations of benzyl alcohol derivatives by **3** and PhIO in  $\text{CDCl}_3$ . The  $\sigma$  values were adopted from S. H. Pine, in *Organic Chemistry (5th Ed.)*, McGraw-Hill, New York, **1987**.
